# Supplementary material
Source: PubMed Central journal article supplement (PMC5557658)

## Supplementary Materials

**Supplementary Figure 1.** Comparison of automated methods for measuring normal-appearing white matter volume from scans acquired at seven NAIMS sites.

**Supplementary Figure 2.** Comparison of automated methods for measuring cortical gray matter volume from scans acquired at seven NAIMS sites.

**Supplementary Figure 3.** Comparison of automated methods for measuring total brain volume from scans acquired at seven NAIMS sites.

**Supplementary Figure 4.** Comparison of automated methods for measuring caudate volume from scans acquired at seven NAIMS sites.

**Supplementary Figure 5.** Comparison of automated methods for measuring putamen volume from scans acquired at seven NAIMS sites.

**Supplementary Figure 6.** Heatmaps of correlation between site-specific average T2 lesion (left), total brain (center), and thalamic (right) measurements for the various algorithms.

**Supplementary Figure 7.** Comparison of manually segmented lesion volumes by time of day of image acquisition, with morning scans indicated by circles and afternoon scans indicated by triangles.

**Supplementary Figure 8.** Comparison of total brain volume measurements for the various algorithms by time of day of image acquisition, with morning scans indicated by circles and afternoon scans indicated by triangles.

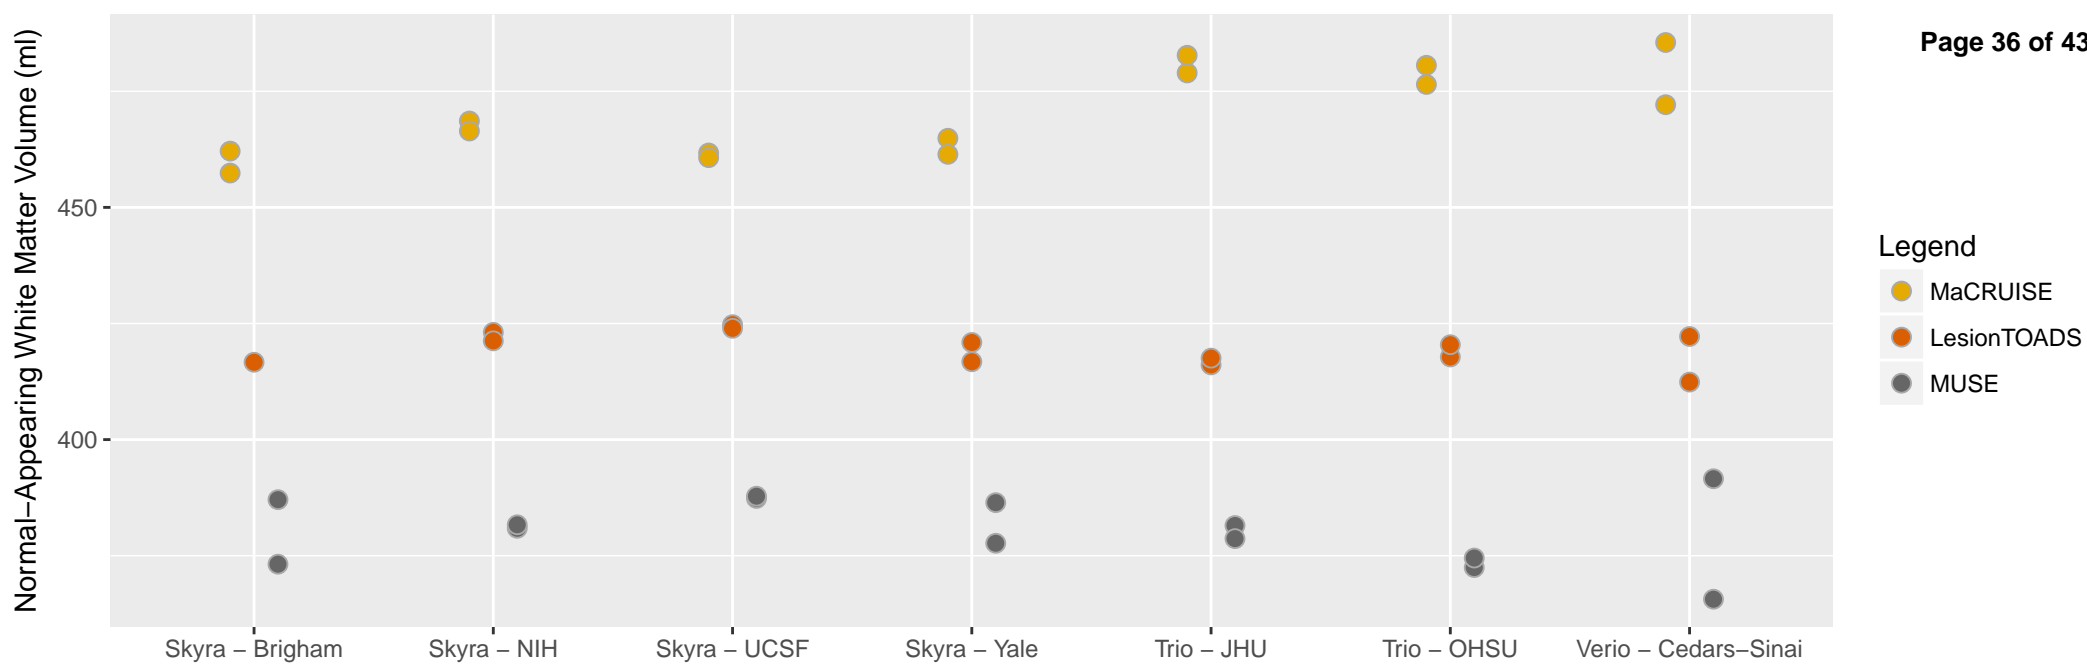

Gray Matter Volume (ml)

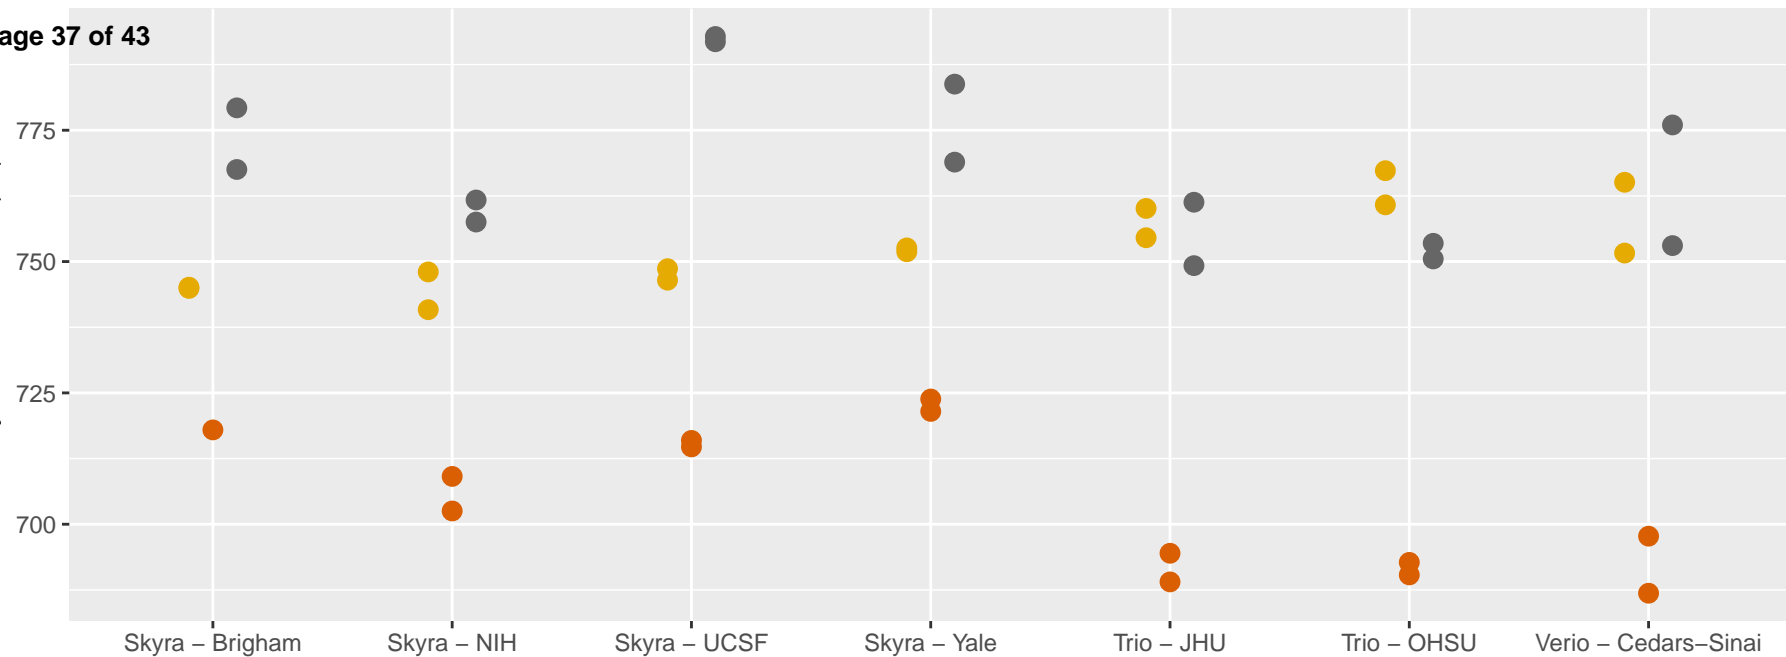

Legend

- MaCRUISE
- LesionTOADS
- MUSE

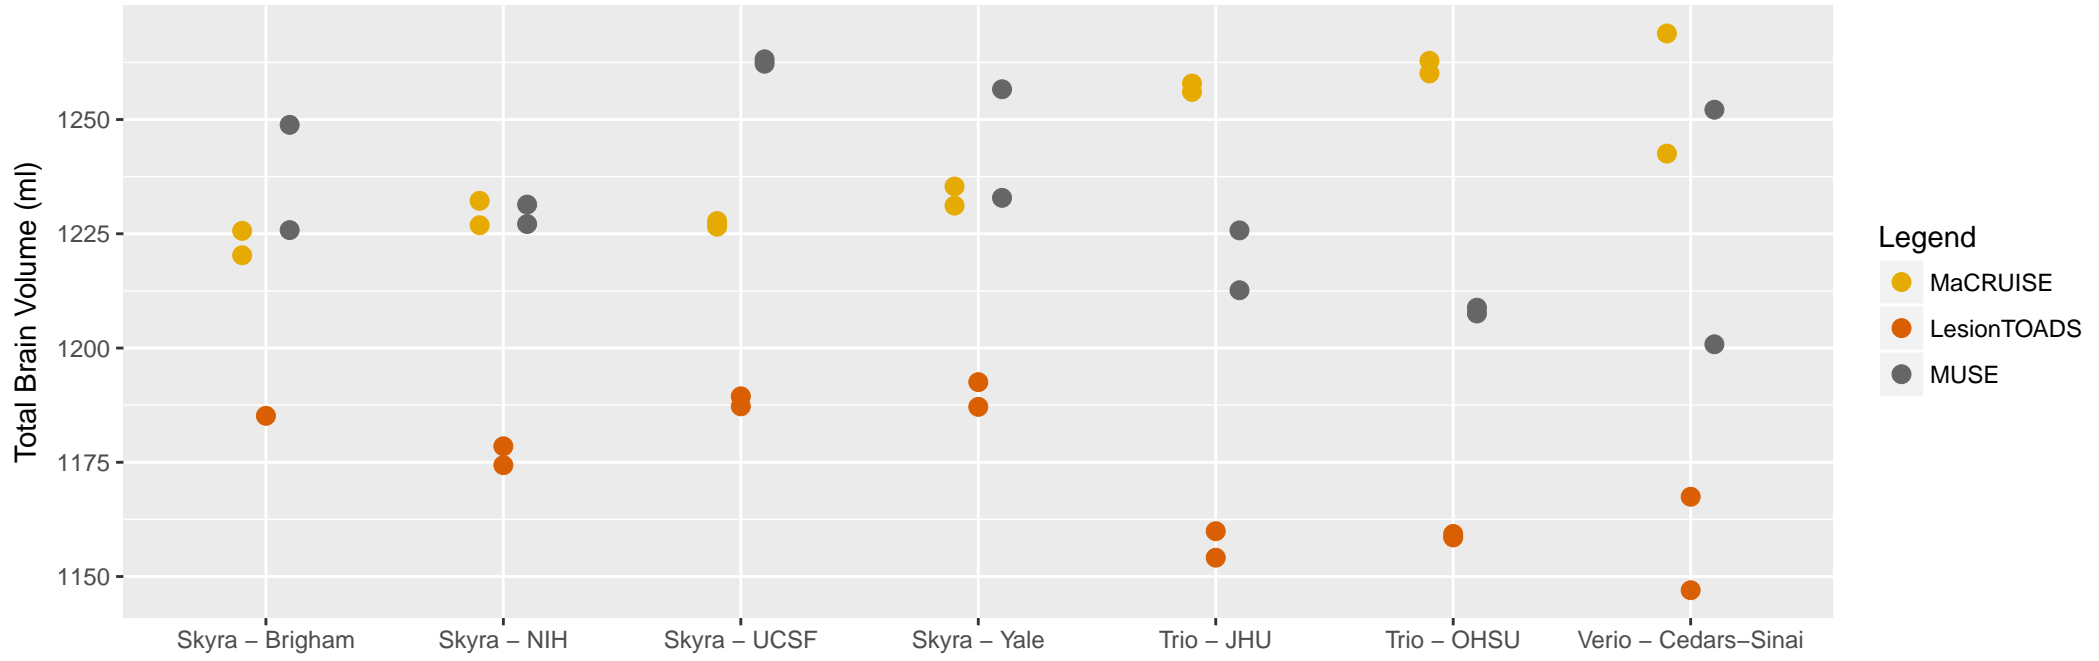

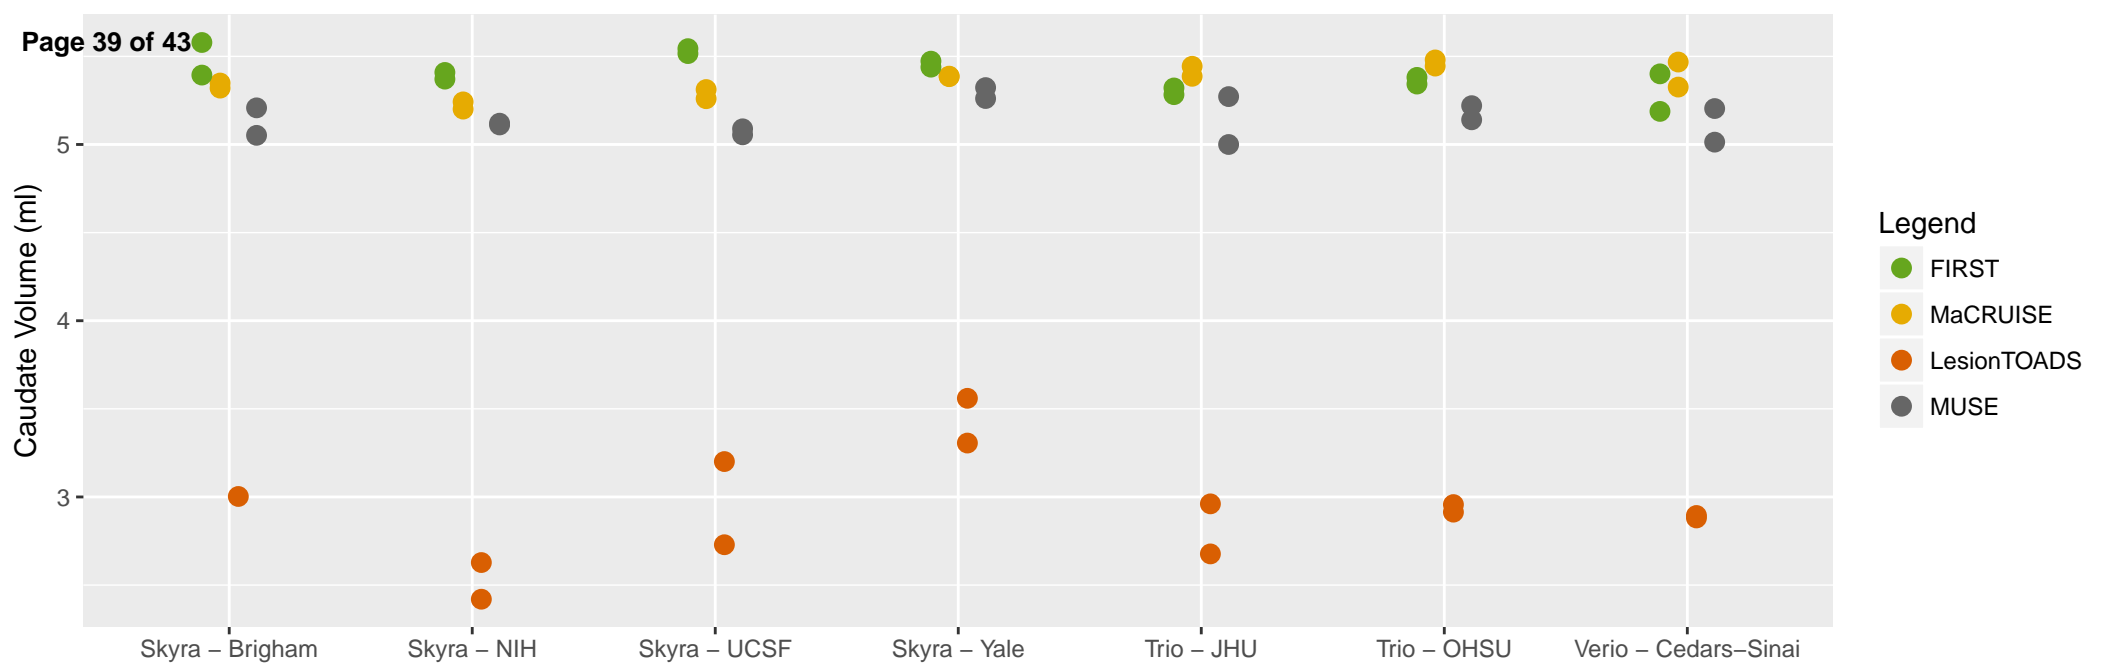

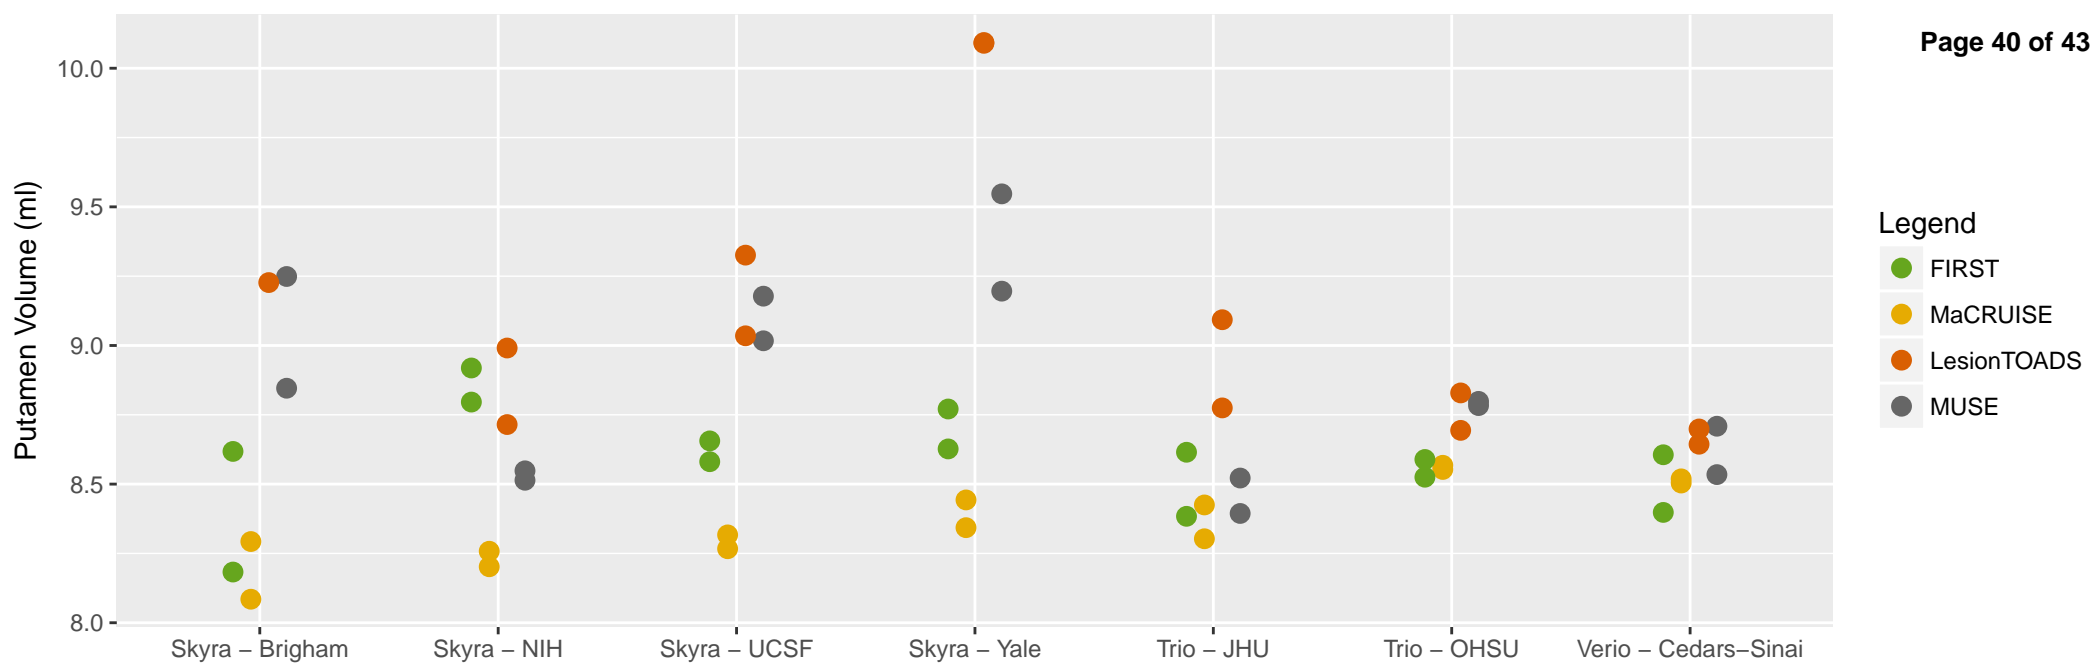

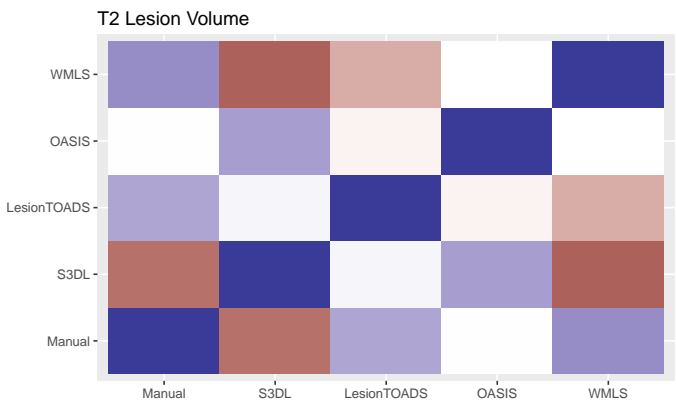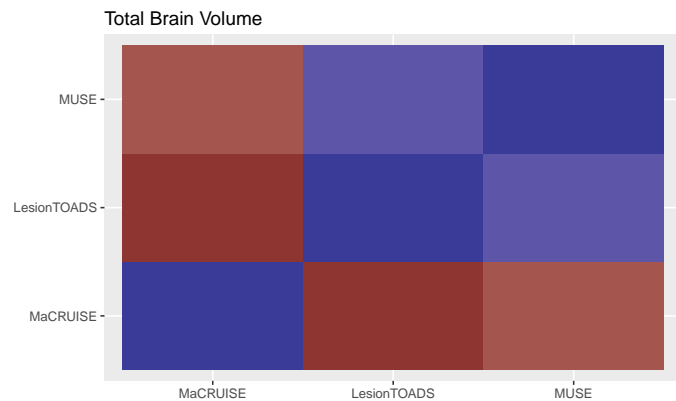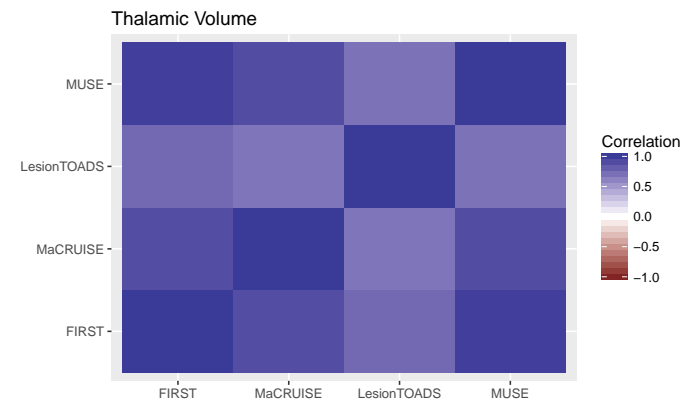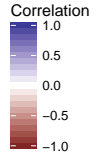

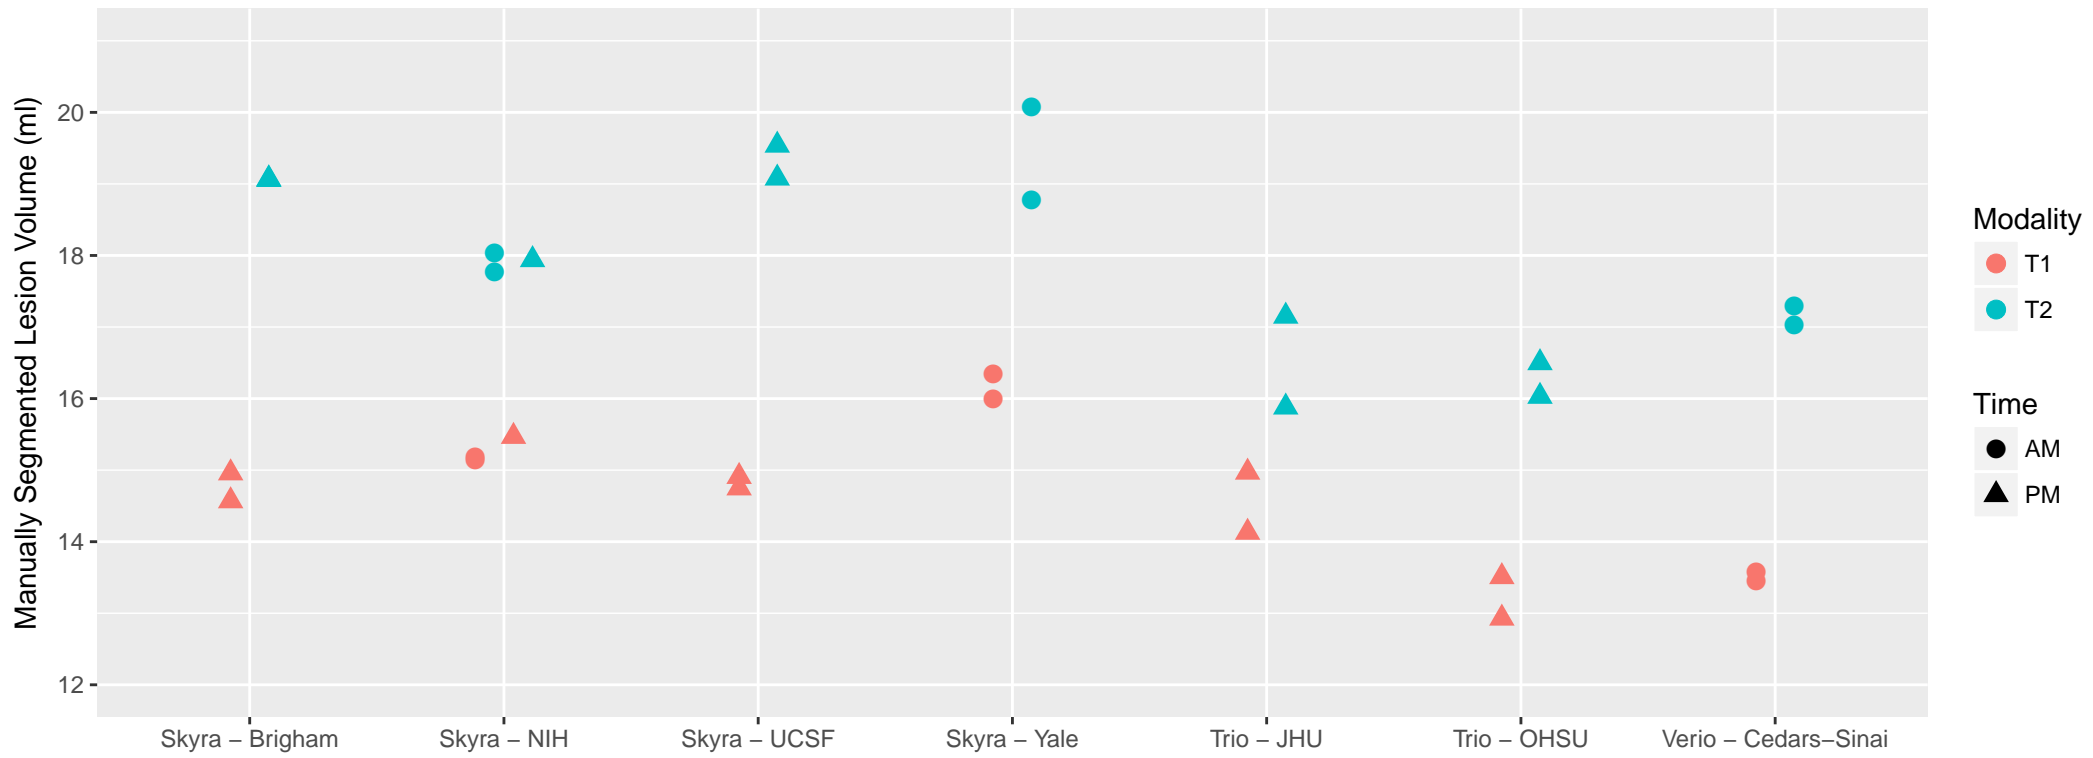



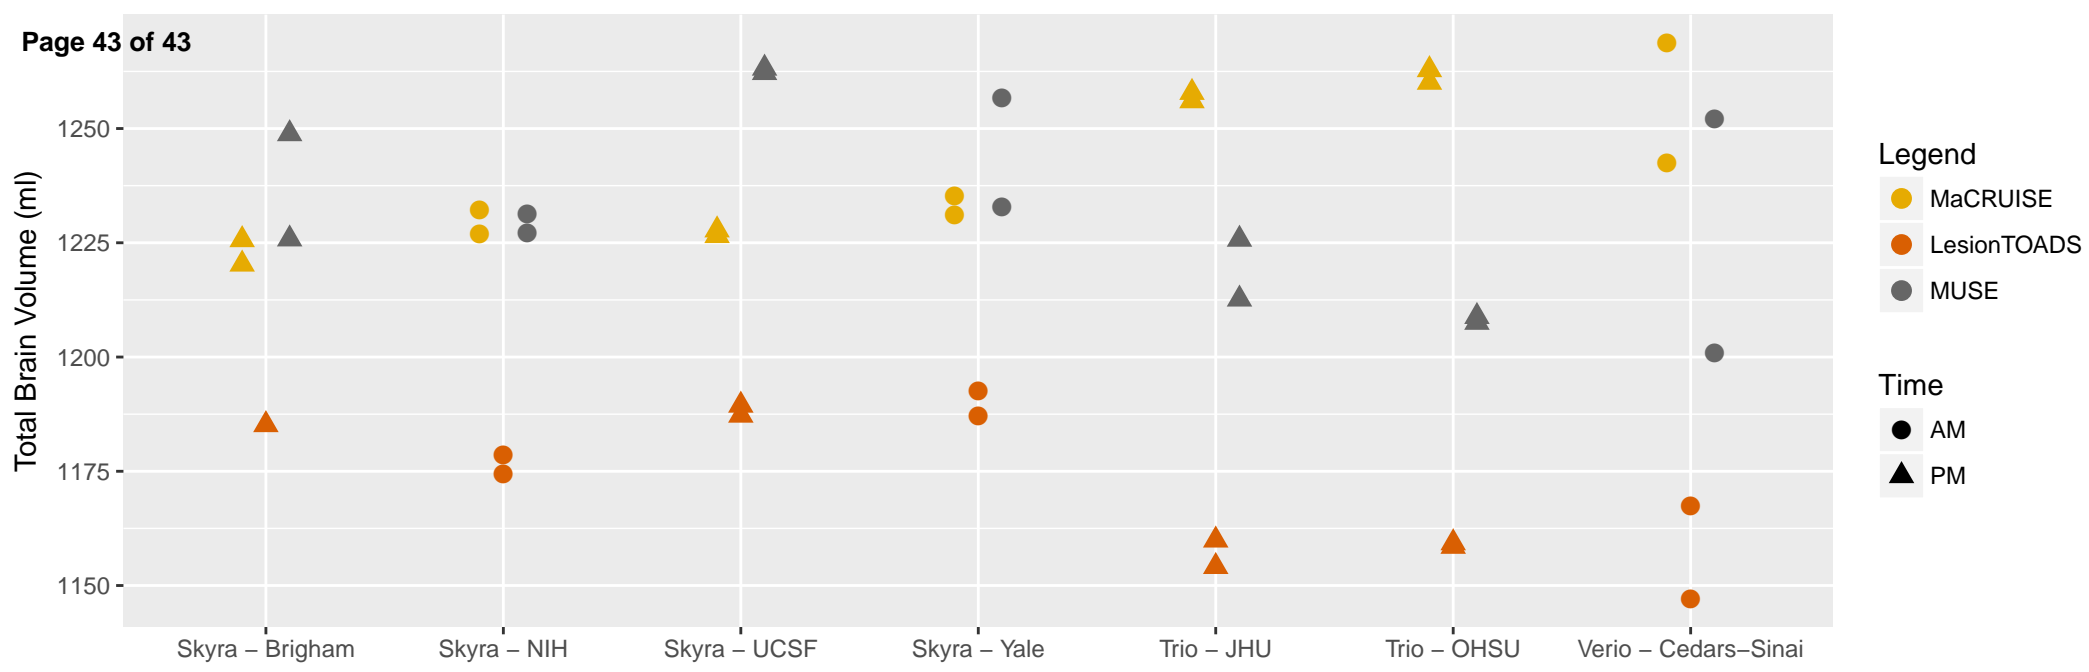

Supplement: NIHMS873162-supplement-supplement_1.pdf [file NIHMS873162-supplement-supplement_1.pdf]
